# Supplementary material for: Patient-reported outcomes from a randomised phase III study of baricitinib in patients with rheumatoid arthritis and an inadequate response to biological agents (RA-BEACON)
Source: PubMed Central journal article supplement — Ann Rheum Dis. 2016 Oct 31;76(4):694–700. doi: 10.1136/annrheumdis-2016-209821 (PMC5530360; doi:10.1136/annrheumdis-2016-209821), 2016-10-31
Supplement: annrheumdis-2016-209821supp001.pdf [file annrheumdis-2016-209821supp001.pdf]

## Online Supplement

**Table S1. Patient characteristics, disease activity and patient-reported outcomes (PROs) at baseline**

| Parameter*                                          | Placebo (N=176) | Baricitinib 2 mg<br>(N=174) | Baricitinib 4 mg<br>(N=177) |
|-----------------------------------------------------|-----------------|-----------------------------|-----------------------------|
| <b><i>Patient characteristics</i></b>               |                 |                             |                             |
| Age, years                                          | 56 (11)         | 55 (11)                     | 56 (11)                     |
| Female patients, n (%)                              | 145 (82)        | 137 (79)                    | 149 (84)                    |
| Duration of RA<br>time from symptom onset,<br>years | 14 (10)         | 14 (8)                      | 14 (9)                      |
| time from diagnosis, years                          | 13 (9)          | 12 (8)                      | 12 (9)                      |
| Number of prior<br>csDMARDs, n (%)                  |                 |                             |                             |
| 0                                                   | 0               | 0                           | 1 (1)                       |
| 1                                                   | 75 (43)         | 66 (38)                     | 71 (40)                     |
| 2                                                   | 47 (27)         | 54 (31)                     | 52 (29)                     |
| ≥3                                                  | 54 (31)         | 54 (31)                     | 53 (30)                     |
| Number of prior<br>bDMARDs <sup>+</sup> , n (%)     |                 |                             |                             |
| 1                                                   | 81 (46)         | 69 (40)                     | 71 (40)                     |
| 2                                                   | 47 (27)         | 55 (32)                     | 58 (33)                     |
| ≥3                                                  | 47 (27)         | 50 (29)                     | 45 (25)                     |
| TNFi <sup>‡</sup>                                   |                 |                             |                             |
| 1                                                   | 104 (59)        | 102 (59)                    | 104 (59)                    |
| 2                                                   | 50 (28)         | 60 (34)                     | 52 (29)                     |
| ≥3                                                  | 19 (11)         | 12 (7)                      | 18 (10)                     |
| Non-TNFi                                            |                 |                             |                             |
| 1                                                   | 37 (21)         | 45 (26)                     | 43 (24)                     |
| 2                                                   | 15 (9)          | 14 (8)                      | 14 (8)                      |
| ≥3                                                  | 10 (6)          | 11 (6)                      | 10 (6)                      |

| <b>Parameter*</b>                                               | <b>Placebo (N=176)</b> | <b>Baricitinib 2 mg<br/>(N=174)</b> | <b>Baricitinib 4 mg<br/>(N=177)</b> |
|-----------------------------------------------------------------|------------------------|-------------------------------------|-------------------------------------|
| <b><i>Disease activity</i></b>                                  |                        |                                     |                                     |
| Swollen joint count, of 66                                      | 17 (11)                | 19 (12)                             | 16 (9)                              |
| Tender joint count, of 68                                       | 28 (16)                | 31 (16)                             | 28 (16)                             |
| hsCRP, mg/L<br>(ULN = 3 mg/L)                                   | 21 (25)                | 20 (22)                             | 20 (25)                             |
| ESR, mm/hour                                                    | 47 (24)                | 45 (24)                             | 48 (26)                             |
| DAS28-hsCRP                                                     | 5.9 (0.9)              | 6.0 (0.9)                           | 5.9 (1.0)                           |
| CDAI                                                            | 41 (13)                | 43 (13)                             | 40 (14)                             |
| SDAI                                                            | 43 (14)                | 45 (14)                             | 42 (14)                             |
| <b><i>Patient-reported outcome measures</i></b>                 |                        |                                     |                                     |
| HRQOL (SF-36; 0–100)                                            |                        |                                     |                                     |
| PCS                                                             | 28.2 (7.7)             | 28.7 (8.1)                          | 29.5 (9.0)                          |
| MCS                                                             | 46.1 (13.7)            | 46.1 (13.1)                         | 46.0 (13.0)                         |
| EQ-5D-5L                                                        |                        |                                     |                                     |
| Health State Index<br>Score, UK algorithm<br>(-0.594–1)         | 0.443 (0.250)          | 0.461 (0.233)                       | 0.427 (0.260)                       |
| Self-perceived<br>health score VAS<br>(0–100)                   | 47.8 (22.4)            | 46.0 (20.8)                         | 47.4 (24.3)                         |
| Fatigue (FACIT-F; 0–52)                                         | 22.2 (10.6)            | 22.5 (10.0)                         | 23.4 (11.3)                         |
| HAQ-DI (0–3)                                                    | 1.78 (0.57)            | 1.71 (0.55)                         | 1.74 (0.59)                         |
| PtGA (0–100 VAS)                                                | 66 (19)                | 67 (19)                             | 66 (22)                             |
| Patient's assessment of<br>pain (0–100 VAS)                     | 65 (19)                | 62 (22)                             | 66 (23)                             |
| Median (IQR) duration of<br>morning joint stiffness,<br>minutes | 90.0<br>(30.0, 150.0)  | 91.0<br>(40.0, 180.0)               | 90.0<br>(30.0, 180.0)               |
| Worst Joint Pain NRS (0–<br>10)                                 | 7.2 (1.8)              | 7.1 (1.7)                           | 7.1 (2.0)                           |

| <b>Parameter*</b>          | <b>Placebo (N=176)</b> | <b>Baricitinib 2 mg<br/>(N=174)</b> | <b>Baricitinib 4 mg<br/>(N=177)</b> |
|----------------------------|------------------------|-------------------------------------|-------------------------------------|
| Worst Tiredness NRS (0–10) | 6.9 (2.1)              | 7.2 (1.8)                           | 6.9 (2.2)                           |

\*Data are presented as mean (standard deviation) unless stated otherwise. Additional data on the patient baseline characteristics can be found in Genovese et al. [17]

\*4 patients (0.8%) did not receive any prior bDMARDs

‡This group includes both patients who have taken only 1 TNFi and those who have taken a combination of 1 TNFi and any other non-TNFi agents. These patients, therefore, may be taking multiple b-DMARDs; as such, this group is not a subset of the bDMARD = 1 group.

bDMARDs = biological disease-modifying antirheumatic drugs; CDAI: Clinical Disease Activity Index; csDMARDs = conventional synthetic disease-modifying antirheumatic drugs;; DAS = Disease Activity Score; EQ-5D-5L = European Quality of Life-5 Dimensions-5 Levels; ESR = erythrocyte sedimentation rate; FACIT-F = Functional Assessment of Chronic Illness Therapy-Fatigue; HAQ-DI = Health Assessment Questionnaire-Disability Index; hsCRP = high-sensitivity C-reactive protein; IQR = interquartile range; MCS = mental component score; NRS = Numeric Rating Scale; PCS = physical component score; PtGA = Patient's Global Assessment of Disease Activity; HRQOL = health-related quality of life; RA = rheumatoid arthritis; SF-36 = Short Form 36 Health Survey; SDAI: Simple Disease Activity Index ; TNFi = tumour necrosis factor inhibitor; UK = United Kingdom; ULN = upper limit of normal; VAS = visual analogue scale.

Score ranges for individual PRO measures are indicated in brackets in the left hand column. Lower scores indicate better outcomes for HAQ-DI, PtGA, patient's assessment of pain, Worst Joint Pain, Worst Tiredness. Higher scores indicate better outcomes for SF-36, EQ-5D and FACIT-F.

**Table S2. Baseline values and least squares mean change from baseline at Weeks 12 and 24 for SF-36 domain scores**

| SF-36 domain scores  | Baseline mean (SD) |                          |                          | Week 12 LSM Δ from baseline |                          |                          | Week 24 LSM Δ from baseline |                          |                          |
|----------------------|--------------------|--------------------------|--------------------------|-----------------------------|--------------------------|--------------------------|-----------------------------|--------------------------|--------------------------|
|                      | Placebo (N=176)    | Baricitinib 2 mg (N=174) | Baricitinib 4 mg (N=177) | Placebo (N=176)             | Baricitinib 2 mg (N=174) | Baricitinib 4 mg (N=177) | Placebo (N=176)             | Baricitinib 2 mg (N=174) | Baricitinib 4 mg (N=177) |
| Physical functioning | 27.8 (8.7)         | 29.2 (9.1)               | 29.3 (10.0)              | 1.4                         | 5.2***                   | 4.7***                   | 0.7                         | 5.6***                   | 5.6***                   |
| Role physical        | 32.4 (9.4)         | 33.0 (8.8)               | 33.9 (9.6)               | 2.9                         | 5.7**                    | 5.1*                     | 2.3                         | 5.5***                   | 5.8***                   |
| Bodily pain          | 31.3 (7.2)         | 32.2 (6.7)               | 32.0 (7.8)               | 4.0                         | 7.4***                   | 8.2***                   | 3.7                         | 7.1***                   | 9.2***                   |
| General health       | 36.4 (8.5)         | 35.2 (9.3)               | 36.7 (9.2)               | 1.3                         | 4.0***                   | 3.0*                     | 0.9                         | 3.4**                    | 2.8*                     |
| Vitality             | 38.8 (9.9)         | 37.7 (10.2)              | 39.7 (10.6)              | 3.1                         | 5.6*                     | 5.9**                    | 3.9                         | 6.3*                     | 6.9**                    |
| Social functioning   | 37.8 (11.8)        | 39.1 (12.1)              | 37.8 (11.6)              | 0.9                         | 3.5*                     | 4.2**                    | 1.1                         | 4.2**                    | 5.3***                   |
| Role emotional       | 40.6 (13.9)        | 42.1 (12.7)              | 41.7 (13.0)              | 1.3                         | 4.2**                    | 1.5                      | 1.0                         | 3.6*                     | 2.6                      |
| Mental health        | 43.0 (12.8)        | 42.9 (12.2)              | 42.9 (12.5)              | 1.3                         | 3.4*                     | 2.6                      | 2.1                         | 2.8                      | 3.0                      |

\*p≤0.05, \*\*p≤0.01, \*\*\*p≤0.001 vs. placebo

**Table S3. Percentage of patients achieving MCID  $\geq 2.5$  for the physical and mental component scores (PCS and MCS) of the SF-36**

| Week                            | % of patients achieving MCID $\geq 2.5$ |      |       |       |      |       |
|---------------------------------|-----------------------------------------|------|-------|-------|------|-------|
|                                 | 4                                       | 8    | 12    | 16    | 20   | 24    |
| <b>Physical Component Score</b> |                                         |      |       |       |      |       |
| Placebo (N=176)                 | 45                                      | 49   | 48    | 40    | 51   | 49    |
| Baricitinib 2 mg (N=174)        | 59**                                    | 63*  | 63**  | 63*** | 63** | 64**  |
| Baricitinib 4 mg (N=177)        | 64***                                   | 64** | 64*** | 62*** | 62** | 64*** |
| <b>Mental Component Score</b>   |                                         |      |       |       |      |       |
| Placebo (N=176)                 | 36                                      | 34   | 40    | 36    | 44   | 45    |
| Baricitinib 2 mg (N=174)        | 39                                      | 37   | 46    | 38    | 36   | 44    |
| Baricitinib 4 mg (N=177)        | 47*                                     | 41   | 44    | 38    | 44   | 44    |

\* $p \leq 0.05$ , \*\* $p \leq 0.01$ , \*\*\* $p \leq 0.001$  vs. placebo

**Table S4. Work Productivity and Activity Impairment Questionnaire- Rheumatoid Arthritis (WPAI-RA) at baseline and least squares change from baseline at 12 and 24 weeks**

**Table S4A) Mean daily activity impairment due to RA administered to all patients at baseline and LSM change from baseline at Week 12 or 24**

| WPAI-RA                                                  | Baseline, mean (SD) |                          |                          | Week 12, LSM (95% CI) $\Delta$ from baseline |                           |                          | Week 24, LSM (95% CI) $\Delta$ from baseline |                          |                            |
|----------------------------------------------------------|---------------------|--------------------------|--------------------------|----------------------------------------------|---------------------------|--------------------------|----------------------------------------------|--------------------------|----------------------------|
|                                                          | Placebo (N=176)     | Baricitinib 2 mg (N=174) | Baricitinib 4 mg (N=176) | Placebo (N=157)                              | Baricitinib 2 mg (N=162)  | Baricitinib 4 mg (N=165) | Placebo (N=91)                               | Baricitinib 2 mg (N=119) | Baricitinib 4 mg (N=125)   |
| Question administered to all patients at given timepoint |                     |                          |                          |                                              |                           |                          |                                              |                          |                            |
| Percentage activity impairment due to RA                 | 66.5<br>(21.4)      | 64.0<br>(19.6)           | 64.6<br>(23.1)           | -9.5<br>(-13.6, -5.3)                        | -16.7**<br>(-20.8, -12.6) | -18.1***<br>(-22.2-14.0) | -15.2<br>(-20.8, -9.6)                       | -22.2*<br>(-27.2, -17.2) | -26.3***<br>(-31.3, -21.4) |

**Table S4B): Number (%) of patients who were employed at baseline and at baseline and Week 12 or 24**

| Questions administered to patients who were employed   | Placebo (N=176) | Baricitinib 2 mg (N=174) | Baricitinib 4 mg (N=176) | Placebo (N=46) | Baricitinib 2 mg (N=65) | Baricitinib 4 mg (N=57) | Placebo (N=27) | Baricitinib 2 mg (N=44) | Baricitinib 4 mg (N=47) |
|--------------------------------------------------------|-----------------|--------------------------|--------------------------|----------------|-------------------------|-------------------------|----------------|-------------------------|-------------------------|
| Employed at timepoint <sup>†</sup> , n (%) of patients | 53 (30)         | 69 (40)                  | 60 (34)                  | 42 (91)        | 61 (94)                 | 51 (90)                 | 22 (82)        | 38 (86)                 | 42 (89)                 |

**Table S4C): Mean presenteeism, work productivity loss, and absenteeism at baseline and LSM change from baseline at Week 12 or 24**

|                                                              | Baseline, mean (SD) |                |                | Week 12, LSM (95% CI) $\Delta$ from baseline |                       |                       | Week 24, LSM (95% CI) $\Delta$ from baseline |                      |                        |
|--------------------------------------------------------------|---------------------|----------------|----------------|----------------------------------------------|-----------------------|-----------------------|----------------------------------------------|----------------------|------------------------|
| Percentage impairment while working due to RA (presenteeism) | 47.6<br>(26.2)      | 47.6<br>(21.3) | 44.6<br>(29.1) | 0.8<br>(-7.0, 8.5)                           | -8.1<br>(-15.0, -1.2) | -7.9<br>(-15.7, -0.2) | -3.2<br>(-15.7, 9.4)                         | -7.6<br>(-18.4, 3.2) | -11.7<br>(-22.2, -1.1) |

|                                                                          |                |                |                |                     |                       |                       |                       |                      |                      |
|--------------------------------------------------------------------------|----------------|----------------|----------------|---------------------|-----------------------|-----------------------|-----------------------|----------------------|----------------------|
| Percentage of overall work impairment due to RA (work productivity loss) | 49.7<br>(26.7) | 52.3<br>(22.8) | 49.1<br>(30.1) | -0.1<br>(-8.5, 8.4) | -9.3<br>(-16.8, -1.8) | -9.4<br>(-17.8, -1.0) | -0.6<br>(-14.6, 13.4) | -6.3<br>(-18.3, 5.7) | -8.4<br>(-20.2, 3.4) |
| Percentage of work time missed due to RA (absenteeism) <sup>‡</sup>      | 10.2<br>(23.3) | 13.7<br>(24.9) | 19.0<br>(29.7) | 2.1<br>(-4.8, 9.0)  | -3.6<br>(-9.7, 2.5)   | -1.9<br>(-8.7, 5.0)   | 8.0<br>(-3.1, 19.1)   | 5.7<br>(-3.8, 15.2)  | 6.0<br>(-3.3, 15.4)  |

\*p≤0.05, \*\*p≤0.01, \*\*\*p≤0.001 vs. placebo

CI = confidence interval; LSM = least squares mean; PtGA = Patient's Global Assessment of Disease Activity; RA = rheumatoid arthritis; SD: Standard Deviation

<sup>†</sup>For Week 12 and 24, % of patients employed at baseline and continued to be employed at the time point

<sup>‡</sup>Results observed at Week 12 for absenteeism were not maintained at Week 24.

**Figure S1. Change in baseline over time for worst joint pain and worst tiredness**

**A) Worst Joint Pain**

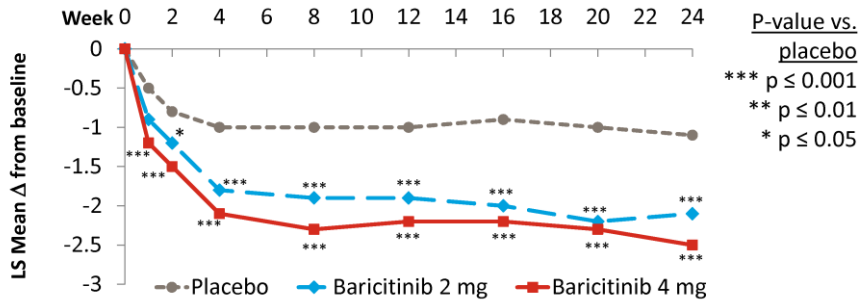

Higher scores indicate worse joint pain.

Higher scores indicate worse joint pain.

**B) Worst Tiredness**

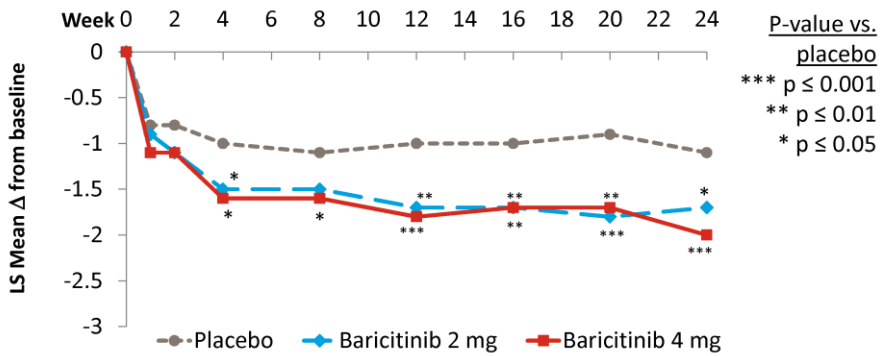

Higher scores indicate more tiredness.

Higher scores indicate more tiredness

LS = least squares; MCID = minimum clinically important difference
